# Supplementary material for: Identification of avoidance genes through neural pathway-specific forward optogenetics
Source: PubMed Central journal article supplement (PMC6938339; doi:10.1371/journal.pgen.1008509), 2019-12-31
Supplement: pgen.1008509.s001.pdf [file pgen.1008509.s001.pdf]

**Figure S1**

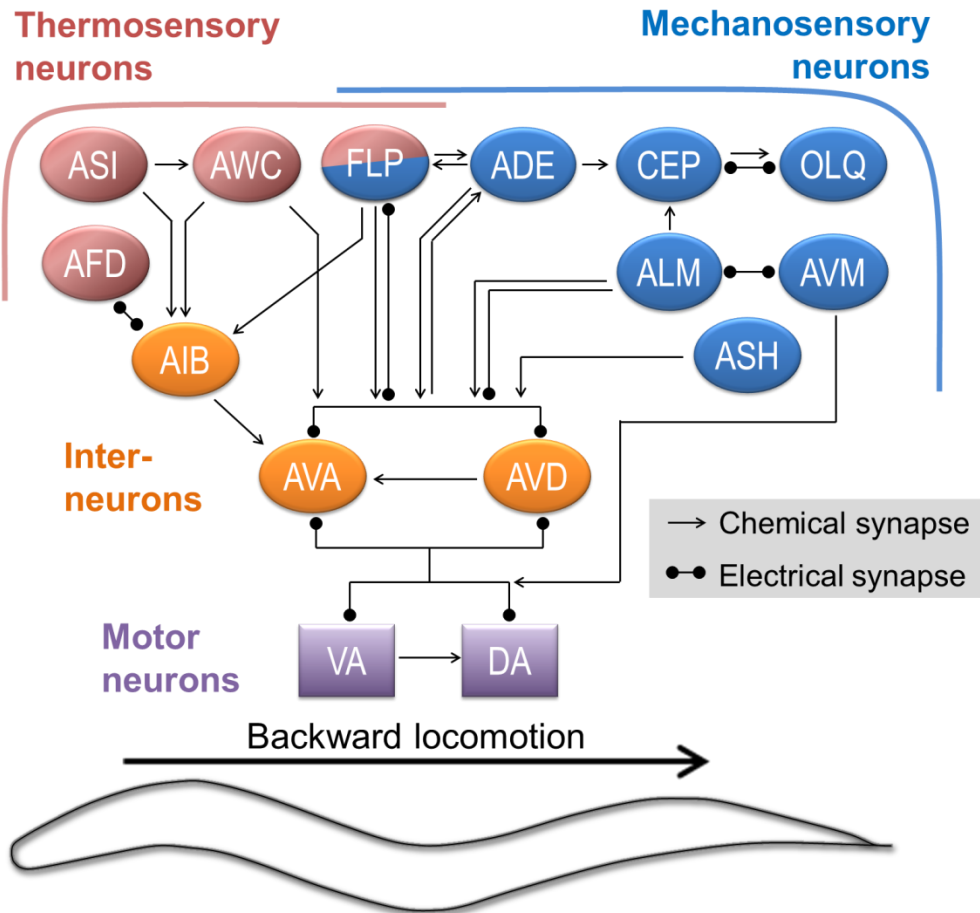

**Figure S1: Anterior thermosensory and mechanosensory neurons and core circuit mediating backward locomotion.** The scheme was inspired by Goodman 2006 [15].
