# Supplementary material for: Identification of avoidance genes through neural pathway-specific forward optogenetics
Source: PubMed Central journal article supplement (PMC6938339; doi:10.1371/journal.pgen.1008509), 2019-12-31
Supplement: pgen.1008509.s003.pdf [file pgen.1008509.s003.pdf]

### S3 Figure

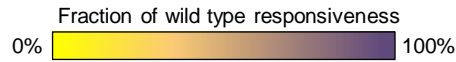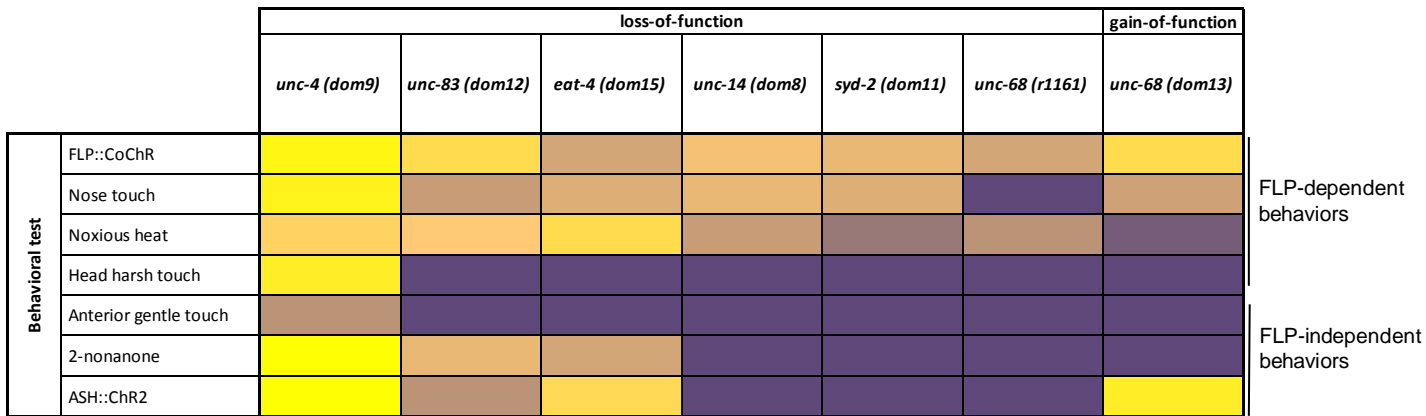

### S3 Figure. Overview of behavioral impairments in mutants

Reversal analysis results from Fig. 3, 4 and 5 pooled in a single heat map. Data are expressed according to the depicted color scale as a fraction of wild type responsiveness.
