# Supplementary material for: Identification of avoidance genes through neural pathway-specific forward optogenetics
Source: PubMed Central journal article supplement (PMC6938339; doi:10.1371/journal.pgen.1008509), 2019-12-31
Supplement: pgen.1008509.s004.pdf [file pgen.1008509.s004.pdf]

## S4 Figure

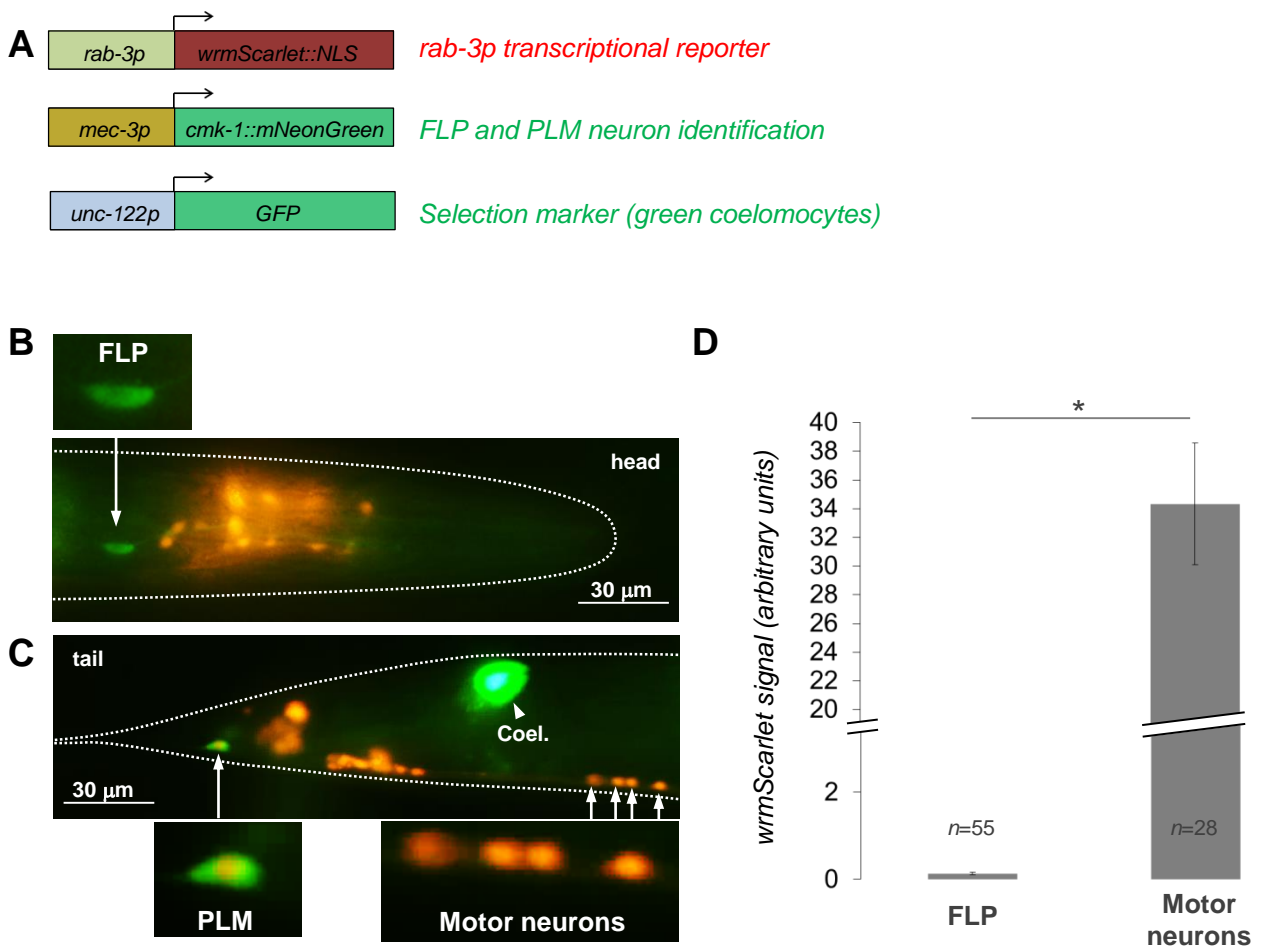

### S4 Figure. The *rab-3* promoter used for ‘pan-neuronal’ *unc-68* rescue drives nearly undetectable expression in FLP

**A:** Schematic of the three transgenes used and their roles.

**B, C:** Representative epifluorescence micrographs from a single animal revealing both green and red signals, using a high pass emission filter and a color camera to visualize both channels. Only green signal is detectable in FLP (**B**, top inset), while red nuclei are detected in PLM (**C**, lower left inset) and a large number of other neurons (including motor neurons, **C**, lower right inset).

**D:** Quantification of [rab-3p::wrmScarlet] signal in FLP and motor neurons. FLP nuclei were localized thanks to the mNeonGreen signal. Acquisition for quantification was made with a RFP filter cube to selectively quantify the wrmScarlet signal. Note the interrupted vertical axis. Grey bars indicate averages, with SEM as error bars. \*,  $p < .001$  by Student’s *t*-test. Data are pooled from two independent transgenic lines showing similar results.
