# Supplementary material for: Identification of avoidance genes through neural pathway-specific forward optogenetics
Source: PubMed Central journal article supplement (PMC6938339; doi:10.1371/journal.pgen.1008509), 2019-12-31
Supplement: pgen.1008509.s005.pdf [file pgen.1008509.s005.pdf]

**S1 Table. New alleles recovered in the genetic screen**

| <b>Allele</b>        | <b>Mutation with flanking genomic sequence</b>           |
|----------------------|----------------------------------------------------------|
| <i>unc-14(dom8)</i>  | TTGGACTGCTGGCTGTGCTA(Tto <b>A</b> )ATTGTGTTGAAAGAGAAGGT  |
| <i>unc-4(dom9)</i>   | AAAATCAAATTTTCAGGTTG(Gto <b>A</b> )CAACTGGAAGAGCTCGAATC  |
| <i>syd-2(dom11)</i>  | AGTTGGAAAATTATAAGGTG(Cto <b>T</b> )AACTGGAAAATGCAGGGCTC  |
| <i>unc-83(dom12)</i> | GTAGCATGAGTGACGGAGAG(Cto <b>T</b> )AATTGGCGTTGTGAGCAGT   |
| <i>unc-68(dom13)</i> | CAAAAATTGAACATTTTTAG(Gto <b>A</b> )TTTGATCATCGACGCTTTTCG |
| <i>eat-4(dom15)</i>  | GGAAAATGCCGAAAACGTTG(Gto <b>A</b> )CTTCTAGCTATTCTTGCAAA  |
