# Supplementary material for: Identification of avoidance genes through neural pathway-specific forward optogenetics
Source: PubMed Central journal article supplement (PMC6938339; doi:10.1371/journal.pgen.1008509), 2019-12-31
Supplement: pgen.1008509.s006.pdf [file pgen.1008509.s006.pdf]

**S2 Table. Strains used in this study****Mutant and integrated transgenic strains**

| <b>Strain name</b> | <b>Genotype</b>                                                         | <b>Comment</b>                                                                                         |
|--------------------|-------------------------------------------------------------------------|--------------------------------------------------------------------------------------------------------|
| N2                 | Wild type                                                               | Obtained from the CGC                                                                                  |
| CB120              | <i>unc-4(e120) II</i>                                                   | Obtained from the CGC                                                                                  |
| MT6308             | <i>eat-4(ky5) III</i>                                                   | Obtained from the CGC                                                                                  |
| LX748              | <i>osm-9(ky10) ocr-2(ak47) IV</i>                                       | Obtained from the CGC                                                                                  |
| CB1472             | <i>mec-6(e1342) I</i>                                                   | Obtained from the CGC                                                                                  |
| TR2170             | <i>unc-68(r1161) V</i>                                                  | Obtained from the CGC                                                                                  |
| DAG356             | <i>domIs355[mec-3p::QF, mec-4p::QS, QUAS::CoChR::GFP, unc122p::RFP]</i> | [ <i>FLP::CoChR</i> ] FLP optogenetic background, used as background for the mutagenesis screen        |
| DAG411             | <i>domIs355; eat-4 (ky5) III</i>                                        | <i>eat-4 (ky5)</i> mutant in FLP optogenetic background                                                |
| DAG502             | <i>domIs355; unc-14(dom8) I</i>                                         | New mutant from the screen in FLP optogenetic background, 3x backcrossed with the parental line DAG356 |
| DAG503             | <i>domIs355; unc-4(dom9) II</i>                                         | New mutant from the screen in FLP optogenetic background, 3x backcrossed with the parental line DAG356 |
| DAG505             | <i>domIs355 ; syd-2(dom11) X</i>                                        | New mutant from the screen in FLP optogenetic background, 3x backcrossed with the parental line DAG356 |
| DAG506             | <i>domIs355; unc-83(dom12) V</i>                                        | New mutant from the screen in FLP optogenetic background, 3x backcrossed with the parental line DAG356 |
| DAG515             | <i>domIs355; unc-68(dom13) V</i>                                        | New mutant from the screen in FLP optogenetic background, 3x backcrossed with the parental line DAG356 |
| DAG517             | <i>domIs355; eat-4(dom15) III</i>                                       | New mutant from the screen in FLP optogenetic background, 3x backcrossed with the parental line DAG356 |
| DAG618             | <i>domIs355;unc-68(r1161) V</i>                                         | <i>unc-68(r1161)</i> mutant in FLP optogenetic background                                              |

|        |                                                                                                                                          |                                                                                          |
|--------|------------------------------------------------------------------------------------------------------------------------------------------|------------------------------------------------------------------------------------------|
| DAG658 | <i>domIs355 ; zwIs100[rab-3p::Myc::ryr-1 + myo-3p::GFP];unc-68 (r1161)</i>                                                               | <i>unc-68(r1161)</i> mutant in FLP optogenetic background with neuronal rescue transgene |
| DAG680 | <i>domIs355; zwIs108[myo-3p::Myc::ryr-1 + myo-3p::GFP];unc-68(r1161)</i>                                                                 | <i>unc-68 (r1161)</i> mutant in FLP optogenetic background with muscle rescue transgene  |
| PHX212 | <i>unc-68 (syb212) V</i>                                                                                                                 | <i>unc-68(syb212)</i> UNC-68 G4996D mutation made by genome editing (SunyBiotech, China) |
| DAG476 | <i>domIs355[mec-3p::QF, mec-4p::QS, QUAS::CoCHR, unc122p::RFP]; domSi453[mec-3p::cmk-1::mNeonGreen::3xFlag::unc-54UTR]</i>               | Reporter for <i>mec-3</i> expression and FLP morphology evaluation                       |
| DAG477 | <i>domIs355[mec-3p::QF, mec-4p::QS, QUAS::CoCHR, unc122p::RFP]; domSi453[mec-3p::cmk-1::mNeonGreen::3xFlag::unc-54UTR];unc-4(dom9)</i>   | Reporter for <i>mec-3</i> expression and FLP morphology evaluation                       |
| DAG479 | <i>domIs355[mec-3p::QF, mec-4p::QS, QUAS::CoCHR, unc122p::RFP]; domSi453[mec-3p::cmk-1::mNeonGreen::3xFlag::unc-54UTR];unc-68(dom13)</i> | Reporter for <i>mec-3</i> expression and FLP morphology evaluation                       |
| DAG485 | <i>domIs355[mec-3p::QF, mec-4p::QS, QUAS::CoCHR, unc122p::RFP]; domSi453[mec-3p::cmk-1::mNeonGreen::3xFlag::unc-54UTR];unc-83(dom12)</i> | Reporter for <i>mec-3</i> expression and FLP morphology evaluation                       |
| DAG498 | <i>domIs355[mec-3p::QF, mec-4p::QS, QUAS::CoCHR, unc122p::RFP]; domSi453[mec-3p::cmk-1::mNeonGreen::3xFlag::unc-54UTR];unc-14(dom8)</i>  | Reporter for <i>mec-3</i> expression and FLP morphology evaluation                       |
| DAG500 | <i>domIs355[mec-3p::QF, mec-4p::QS, QUAS::CoCHR, unc122p::RFP]; domSi453[mec-3p::cmk-1::mNeonGreen::3xFlag::unc-54UTR];syd-2(dom11)</i>  | Reporter for <i>mec-3</i> expression and FLP morphology evaluation                       |

|        |                                                                                                                                          |                                                                    |
|--------|------------------------------------------------------------------------------------------------------------------------------------------|--------------------------------------------------------------------|
| DAG483 | <i>dom1s355[mec-3p::QF, mec-4p::QS, QUAS::CoCHR, unc122p::RFP]; domSi453[mec-3p::cmk-1::mNeonGreen::3xFlag::unc-54UTR]; eat-4(dom15)</i> | Reporter for <i>mec-3</i> expression and FLP morphology evaluation |
| DAG871 | <i>unc-14(dom8) I</i>                                                                                                                    | New mutant from the screen outcrossed to wild type background      |
| DAG872 | <i>unc-4(dom9) II</i>                                                                                                                    | New mutant from the screen outcrossed to wild type background      |
| DAG873 | <i>syd-2(dom11) X</i>                                                                                                                    | New mutant from the screen outcrossed to wild type background      |
| DAG874 | <i>unc-68(dom13) V</i>                                                                                                                   | New mutant from the screen outcrossed to wild type background      |
| DAG875 | <i>eat-4(dom15) III</i>                                                                                                                  | New mutant from the screen outcrossed to wild type background      |
| DAG882 | <i>unc-83(dom12) V</i>                                                                                                                   | New mutant from the screen outcrossed to wild type background      |
| AQ2235 | <i>lite-1(ce314); ljls114[Pgpa-13::FLPase, Psra6::FTF::Chr2::YFP] X</i>                                                                  | New mutant from the screen in [ASH:Chr2] optogenetic background    |
| DAG814 | <i>lite-1(ce314); ljls114[Pgpa-13::FLPase, Psra6::FTF::Chr2::YFP] X; unc-68(r1161) V</i>                                                 | New mutant from the screen in [ASH:Chr2] optogenetic background    |
| DAG919 | <i>lite-1(ce314); ljls114[Pgpa-13::FLPase, Psra-6::FTF::Chr2::YFP] X ; eat-4(ky5)III</i>                                                 | New mutant from the screen in [ASH:Chr2] optogenetic background    |
| DAG920 | <i>lite-1(ce314); ljls114[Pgpa-13::FLPase, Psra-6::FTF::Chr2::YFP] X; unc-68(dom13) V</i>                                                | New mutant from the screen in [ASH:Chr2] optogenetic background    |
| DAG921 | <i>lite-1(ce314); ljls114[Pgpa-13::FLPase, Psra-6::FTF::Chr2::YFP] X; unc-4(dom9) II</i>                                                 | New mutant from the screen in [ASH:Chr2] optogenetic background    |
| DAG922 | <i>lite-1(ce314); ljls114[Pgpa-13::FLPase, Psra-6::FTF::Chr2::YFP] X; unc-83(dom12) V</i>                                                | New mutant from the screen in [ASH:Chr2] optogenetic background    |
| DAG923 | <i>lite-1(ce314); ljls114[Pgpa-13::FLPase, Psra-6::FTF::Chr2::YFP] X; unc-14(dom8) I</i>                                                 | New mutant from the screen in [ASH:Chr2] optogenetic background    |
| DAG970 | <i>lite-1(ce314); ljls114[Pgpa-13::FLPase, Psra-6::FTF::Chr2::YFP] syd-2(dom11) X</i>                                                    | New mutant from the screen in [ASH:Chr2] optogenetic background    |

**Strains carrying non-integrated extra-chromosomal arrays**

| Strain         | Genotype                                                                                                                     | Comment                                                                                                           |
|----------------|------------------------------------------------------------------------------------------------------------------------------|-------------------------------------------------------------------------------------------------------------------|
| DAG624-625     | <i>domIs355; unc-14(dom8) I; domEx624-625[unc-14p::unc 14CDS::SL2::mCherry, unc122p::GFP]</i>                                | <i>unc-14(dom8)</i> rescue with the endogenous <i>unc-14</i> promoter driving <i>unc-14</i> coding sequence (CDS) |
| DAG609         | <i>domIs355; unc-4(dom9) II; domEx609[unc-4p::unc-4CDS::SL2::mCherry::unc122p::GFP]</i>                                      | <i>unc-4(dom9)</i> rescue with the endogenous <i>unc-4</i> promoter driving <i>unc-4</i> coding sequence (CDS)    |
| DAG629-630     | <i>domIs355; syd-2(dom11) X; domEx629-630[syd-2p::syd2CDS::SL2::mCherry, unc122p::GFP]</i>                                   | <i>syd-2(dom11)</i> rescue with the endogenous <i>syd-2</i> promoter driving <i>syd-2</i> coding sequence (CDS)   |
| DAG631-632     | <i>domIs355; unc-83(dom12) V; domEx631-632[W01A11cosmid, unc122p::GFP]</i>                                                   | <i>unc-83(dom12)</i> rescue with <i>unc-83</i> cosmid W01A11                                                      |
| DAG638/688     | <i>domIs355; unc-68(dom13) V; domEx638/688[WRM069cA02fosmid, unc122p::GFP]</i>                                               | <i>unc-68(dom13)</i> rescue with <i>unc-68</i> fosmid WRM069cA02                                                  |
| DAG952         | <i>domIs355; eat-4(dom15) III; domEx952(F23K23 fosmid, unc122p::GFP)</i>                                                     | <i>eat-4(dom15)</i> rescue with <i>eat-4</i> fosmid F23K23                                                        |
| DAG787-788/861 | <i>domIs355; unc68(r1161) V; domEx787-788/861[unc-68p_QF,SL2mCherry_ unc122p::GFP];QUAS_ unc-68fosmid(exon1(fs))</i>         | <i>unc-68(r1161)</i> rescue with frameshift <i>unc-68</i> fosmid driven by <i>unc-68</i> promoter                 |
| DAG869         | <i>domIs355; unc-68(r1161) V; domEx869[mec-3p::QF::SL2::mCherry, unc122p::GFP]; domEx681[QUAS_ unc-68fosmid]</i>             | <i>unc-68(r1161)</i> rescue with <i>unc-68</i> fosmid driven by <i>mec-3</i> promoter                             |
| DAG683-684     | <i>domIs355 ; unc-68(r1161) V; domEx683-684[WRM069cA02fosmid_ unc122p::GFP]</i>                                              | <i>unc-68 (r1161)</i> rescue with fosmid WRM069cA02                                                               |
| DAG778-779     | <i>domIs355; domEx778-779[unc-68p_ unc-68 RNAisense,SL2mCherry_ unc122p::GFP]</i>                                            | <i>unc-68</i> RNAi sense control with <i>unc-68</i> promoter                                                      |
| DAG780-781     | <i>domIs355; domEx778-779[mec-3p_ unc-68 RNAisense,SL2mCherry_ unc122p::GFP]</i>                                             | <i>unc-68</i> RNAi sense control with <i>mec-3</i> promoter                                                       |
| DAG832-834     | <i>domIs355]; domEx832-834[mec-3p::unc-68RNAi_sense::SL2mCherry, mec-3p::unc-68RNAi_antisense::SL2mCherry, unc122p::GFP]</i> | <i>unc-68</i> RNAi double-strand with <i>mec-3</i> promoter                                                       |

|                          |                                                                                                                               |                                                                                                                 |
|--------------------------|-------------------------------------------------------------------------------------------------------------------------------|-----------------------------------------------------------------------------------------------------------------|
| DAG837-839               | <i>domIs355; domEx837-839[unc-68p::unc-68RNAi_sense::SL2mCherry, unc-68p::unc-68RNAi_antisense::SL2mCherry, unc122p::GFP]</i> | <i>unc-68</i> RNAi double-strand with <i>unc-68</i> promoter                                                    |
| AQ2145                   | <i>ljEx19[pegl-46::YC2.3 lin-15(+)]</i>                                                                                       | Calcium response assessment                                                                                     |
| DAG815                   | <i>ljEx19[pegl-46::YC2.3 lin-15(+)]; unc-68(dom13) V</i>                                                                      | Calcium response assessment                                                                                     |
| DAG747                   | <i>ljEx19[pegl-46::YC2.3 lin-15(+)]; unc-68(r1161) V</i>                                                                      | Calcium response assessment                                                                                     |
| DAG960-961               | <i>domSi439[mec3p::cmk1::mNeonGreen::3xFlag::unc-4UTR] II; domEx960961[rab-3_1208prom::NLSegl-13::wrmScarlet::unc-54UTR]</i>  | <i>rab-3p</i> expression reporter in red with FLP identification in green                                       |
| DAG1071-1072             | <i>domIs355; unc-14(dom8) I; domEx1071-1072[mec-3p::unc-14CDS::SL2::mCherry, unc122p::GFP]</i>                                | <i>unc-14(dom8)</i> rescue with <i>mec-3</i> promoter driving <i>unc-14</i> coding sequence (CDS)               |
| DAG1082-1083             | <i>domIs355; unc-4(dom9) II; domEx1082-1083[mec-3p::unc-4CDS::SL2::mCherry::unc122p::GFP]</i>                                 | <i>unc-4(dom9)</i> rescue with <i>mec-3</i> promoter driving <i>unc-4</i> coding sequence (CDS)                 |
| DAG1070;<br>DAG1073-1074 | <i>domIs355; syd-2(dom11) X; domEx1070;1073-1074[mec-3p::syd-2CDS::SL2::mCherry, unc122p::GFP]</i>                            | <i>syd-2(dom11)</i> rescue with <i>mec-3</i> promoter driving <i>syd-2</i> coding sequence (CDS)                |
| DAG1076-1078             | <i>domIs355; eat-4(dom15) III; domEx1076-1078 [eat-4-p::eat-4CDS::SL2::mCherry, unc122p::GFP]</i>                             | <i>eat-4(dom15)</i> rescue with the endogenous <i>eat-4</i> promoter driving <i>eat-4</i> coding sequence (CDS) |
| DAG1079-1081             | <i>domIs355; eat-4(dom15) III; domEx1079-1081[mec-3p::eat-4CDS::SL2::mCherry, unc122p::GFP]</i>                               | <i>eat-4(dom15)</i> rescue with <i>mec-3</i> promoter driving <i>eat-4</i> coding sequence (CDS)                |
